# Supplementary material
Source: Springer Nature journal article supplement (https://www.springermedizin.de/resource/supplementary/12865_2008_224_MOESM6_ESM.pdf/9427624)
Supplement: MOESM6 [file 9427624]

|                                           | 39           | 60             | 80                | 100             | 130                                  |
|-------------------------------------------|--------------|----------------|-------------------|-----------------|--------------------------------------|
| Porcine SAAF <sub>0</sub> -R <sub>0</sub> | -SDMREANYKNS | DKYFHARGNYDAAR | RGPGGAWAAKVISDARE | ENVQRVTDLFKHGDS | GHGVE DSRADQAANAWGRSGKDPNHFRPRGLPD-- |
| Porcine SAA2                              | YSDMREANYKNS | DKYFHARGNYDAAQ | RGPGGAWAAKVISDARE | ENVQRVTDLFKHGDS | GHGVE DSRADQAANAWGRSGKDPNHFRPRGLPDKY |
| Mink SAA2                                 | YSDMREANYKNS | DKYFHARGNYDAAQ | RGPGGAWAAKVISDARE | RSQRVTDLFKYGDS  | GHGVE DSKADQAANEWGRSGKDPNHFRPSGLPDKY |
| Hamster SAA2                              | YTDMREANWKNS | DKYFHARGNYDAAQ | RGPGGAWAAKVISDARE | GFKRMR-----     | GRGIE DSRADQFANEWGRSGKDPNFFRPPGLPSKY |
| Human SAA2                                | YSDMREANYIGS | DKYFHARGNYDAAK | RGPGGAWAAEVISNARE | NIQRLT-----     | GHGAE DSLADQAANKWGRSGRDPNHFRPAGLPEKY |
| Rabbit SAA2                               | YSDMREANYINA | DKYFHARGNYDAAQ | RGPGGVWAAKVISDV   | REDLQRLM-----   | GHGAE DSMADQAANEWGRSGKDPNHFRPKGLPDKY |
| Mouse SAA2                                | YTDMKEAGWKDG | DKYFHARGNYDAAQ | RGPGGVWAAEKISDARE | SFQEFF-----     | GRGHE DTMADQEANRHGRSGKDPNYRPPGLPDKY  |

Serum amyloid A  
 Proteins  
 signature

Q  
 ARGNYEA KRG GG WA  
 D R
